# Supplementary material for: Analysis of Bacteriohopanoids from Thermophilic Bacteria by Liquid Chromatography–Mass Spectrometry
Source: MDPI journal article supplement (doi:10.3390/microorganisms9102062), 2021-09-30
Supplement: s1 [file s1]

# Analysis of Bacteriohopanoids from Thermophilic Bacteria by Liquid Chromatography-Mass Spectrometry

Irena Kolouchová <sup>1</sup>, Elizaveta Timkina <sup>1</sup>, Olga Mařátková <sup>1</sup>, Lucie Kyselová <sup>2</sup> and Tomáš Řezanka<sup>3,\*</sup>

<sup>1</sup> Department of Biotechnology, Faculty of Food and Biochemical Technology, University of Chemistry and Technology Prague, Technická 5, 16628 Prague, Czech Republic; irena.kolouchova@vscht.cz

<sup>2</sup> Research Institute of Brewing and Malting, Lípová 511, 120 44 Prague, Czech Republic; kyselova@beerresearch.cz

<sup>3</sup> Institute of Microbiology, the Czech Academy of Sciences, 142 20 Prague 4, Vídeňská1083, Czech Republic; rezanka@biomed.cas.cz

\* Correspondence: rezanka@biomed.cas.cz

**Table S1.** Selected microorganisms analysed for the presence of bacteriohopanepolyols.

| Current Name of Microorganism          | Alternative Approved Name                      | Number of SHC Records | Example of GenBank Accession Number | References |
|----------------------------------------|------------------------------------------------|-----------------------|-------------------------------------|------------|
| <b>BACTERIA</b>                        |                                                |                       |                                     |            |
| <i>Alicyclobacillus acidocaldarius</i> | –                                              | 53                    | WP_014465455.1                      | [1–5]      |
| strain 104-1A                          | ATCC 27009                                     | –                     | –                                   | [3,4]      |
| <i>Bacillus subtilis</i> (spores)      | –                                              | >100                  | AAB84441.1                          | e.g. [6]   |
| strain TB10                            | –                                              | 1                     | AHA77980.1                          | [6]        |
| <i>Blastochloris viridis</i>           | <i>Rhodopseudomonas viridis</i>                | 0                     | CUU42009.1<br>squalene synthase     | [7]        |
| <i>Bradyrhizobium japonicum</i>        | <i>Rhizobium japonicum</i>                     | 19                    | CAA60250.1                          | [8,9]      |
| <i>Ca. Brocadia</i> sp.                | –                                              | 18                    | QQR66062.1                          | [10]       |
| <i>Burkholderia cepacia</i>            | <i>Pseudomonas cepacia</i>                     | >100                  | KML22412.1                          | [11]       |
| strain WH 8501                         | –                                              | 1                     | EAM53094.1                          | [12]       |
| <i>Desulfovibrio bastinii</i>          | <i>Maridesulfovibrio bastinii</i>              | 1                     | WP_034633519.1                      | [13]       |
| strain DSM 16055                       | –                                              | 1                     | WP_034633519.1                      | [13]       |
| <i>Frankia</i> sp.                     | –                                              | –                     | ABW14125.1                          | [10]       |
| Ea1-12                                 | DSM 107422                                     | 3                     | WP_112105706.1                      | [10]       |
| <i>Frateuria aurantia</i>              | –                                              | 2                     | AFC87535.1<br>AFC85227.1            | [14]       |
| strain DSM 6220                        | –                                              | 2                     | AFC87535.1<br>AFC85227.1            | [14]       |
| <i>Geobacter metallireducens</i>       | –                                              | 6                     | EHP88049.1                          | [15]       |
| strain DSMZ 7210                       | GS-15                                          | 2                     | ABB33038.1<br>ABB30662.1            | [15]       |
| <i>Geobacter sulfurreducens</i>        | –                                              | 11                    | WP_045667657.1                      | [15]       |
| <i>Komagataeibacter xylinus</i>        | <i>Acetobacter aceti</i> subsp. <i>xylinus</i> | 15                    | WP_159262470.1                      | [10,16]    |
| strain R-2277                          | –                                              | 0                     | –                                   | [10]       |
| <i>Methylococcoides burtonii</i>       | –                                              | 5                     | WP_009061034.1                      | [17]       |
| strain Sol V                           | –                                              | 1                     | CCG92847.1                          | [17]       |
| <i>Methylobacterium fujisawaense</i>   | –                                              | 0                     | WP_182591194.1<br>squalene synthase | [18]       |
| <i>Methylobacterium organophilum</i>   | –                                              | 5                     | PVY93823.1                          | [19]       |
| <i>Methylocella palustris</i>          | –                                              | 0                     | –                                   | [10,17]    |
| <i>Methylococcus capsulatus</i>        | –                                              | 5                     | WP_010960137.1                      | [20–24]    |
| strain NCBI 11132                      | –                                              | 0                     | –                                   | [20]       |
| strain ATCC 33009                      | –                                              | 0                     | –                                   | [21]       |
| <i>Methylomirabilis oxyfera</i>        | –                                              | 2                     | CBE67168.1<br>KAB2961492.1          | [25]       |
| <i>Methylomonas methanica</i>          | –                                              | 5                     | OAI06767.1                          | [20,21]    |
| strain NCBI 11130                      | –                                              | 1                     | OAI06767.1                          | [20]       |
| strain ATCC 35067                      | –                                              | 0                     | –                                   | [21]       |
| <i>Methylophilus methylotrophus</i>    | –                                              | 0                     | WP_018985602.1<br>squalene synthase | [21]       |
| <i>Methylosinus trichosporium</i>      | –                                              | 1                     | ATQ69413.1                          | [21,23]    |
| OB3b                                   | –                                              | 1                     | ATQ69413.1                          | [21]       |
| <i>Methylovulum psychrotolerans</i>    | –                                              | 9                     | WP_103975581.1                      | [26]       |
| strain Sph1 <sup>T</sup>               | LMG 29227                                      | 2                     | POZ51441.1<br>POZ50074.1            | [26]       |
| strain OZ2                             | –                                              | 0                     | –                                   | [26]       |
| strain Sph56                           | –                                              | 0                     | MH701868.1                          | [26]       |

|                                                |                                    |    |                                     |               |
|------------------------------------------------|------------------------------------|----|-------------------------------------|---------------|
|                                                |                                    |    | partial sequence                    |               |
| <i>Nitrosomonas europaea</i>                   | –                                  | 1  | WP_011111759.1                      | [27]          |
| <i>Paenibacillus arachidis</i>                 | –                                  | 0  | –                                   | [28]          |
| <i>Rhodobacter capsulatus</i>                  | <i>Rhodopseudomonas capsulata</i>  | 0  | P17056.1<br>phytoene synthase       | [7]           |
| <i>Rhodoblastus acidophilus</i>                | <i>Rhodopseudomonas acidophila</i> | 5  | WP_155446705.1                      | [29,30]       |
| strain DSM 145                                 | –                                  | 0  | –                                   | [29,30]       |
| <i>Rhodomicrobium vannielii</i>                | –                                  | 3  | WP_210336511.1                      | [31]          |
| strain ATCC 17100                              | –                                  | 1  | ADP72221.1                          | [31]          |
| <i>Rhodopseudomonas palustris</i>              | –                                  | 36 | WP_047307546.1                      | [16,29,32–35] |
| strain DSM 139                                 | –                                  | 0  | –                                   | [29]          |
| strain TIE1                                    | –                                  | 1  | ACF02757.1                          | [32–35]       |
| strain DSM-123                                 | –                                  | 0  | –                                   | [34]          |
| strain CGA009                                  | –                                  | 1  | WP_011159278.1                      | [34]          |
| strain BisA53                                  | –                                  | 1  | ABJ08391.1                          | [34]          |
| strain BisB5                                   | –                                  | 1  | ABE40796.1                          | [34]          |
| strain BisB18                                  | –                                  | 1  | ABD87279.1                          | [34]          |
| strain HaA2                                    | –                                  | 1  | ABD06434.1                          | [34]          |
| <i>Rubrivivax gelatinosus</i>                  | <i>Rhodopseudomonas gelatinosa</i> | 0  | WP_200222390.1<br>squalene synthase | [7]           |
| <i>Salinicoccus halitifaciens</i>              | –                                  | 0  | –                                   | [36]          |
| <i>Ca. Scalindua brodeae</i>                   | <i>Ca. Scalindua sorokinii</i>     | 1  | KHE93133.1                          | [10]          |
| <i>Streptomyces coelicolor</i>                 | –                                  | 3  | QFI46551.1                          | [37]          |
| strain A3(2)                                   | –                                  | 2  | QFI46551.1<br>CAB39697.1            | [37]          |
| <i>Streptomyces peucetius</i>                  | –                                  | 1  | ATW51727.1                          | [38]          |
| strain <i>S. peucetius</i> subsp. <i>caesi</i> | –                                  | 2  | ACA52082.1<br>ATW51727.1            | [38]          |
| strain ATCC 27952                              | –                                  | 3  | WP_059080096.1                      | [39]          |
| <i>Streptomyces scabiei</i>                    | –                                  | 1  | CBG68454.1<br>(putative)            | [39]          |
| strain 87-22                                   | –                                  | 1  | –                                   | –             |
| <i>Streptomyces venezuelae</i>                 | <i>Streptomyces venezuelensis</i>  | 21 | WP_150501443                        | –             |
| <i>Thiocapsa rosea</i>                         | <i>Amoebobacter roseus</i>         | 0  | –                                   | [11]          |
| <i>Zymomonas mobilis</i>                       | –                                  | 46 | WP_038259183.1                      | [22]          |
| <i>Zymomonas mobilis</i> subsp. <i>mobilis</i> | –                                  | 21 | ACV76194.1                          | [40]          |
| strain ATCC 29191                              | –                                  | 2  | AFN57413.1<br>AFN56323.1            | [40]          |
| CYANOBACTERIA - marine                         |                                    |    |                                     |               |
| <i>Crocospaera watsonii</i>                    | –                                  | 9  | WP_021835865.1                      | [12,41]       |
| WH8501                                         | –                                  | 1  | EAM53094.1                          | [41]          |
| <i>Synechococcus</i> sp.                       | –                                  | 10 | AFY75324.1                          | [41]          |
| strains PCC 6907, PCC 6714, WH8102             | –                                  | 0  | –                                   | [41]          |
| <i>Trichodesmium erythraeum</i>                | –                                  | 2  | WP_011610552.1                      | [41]          |
| strain IMS-101                                 | –                                  | 1  | ABG50159.1                          | [41]          |
| CYANOBACTERIA – non-marine                     |                                    |    |                                     |               |
| <i>Anabena cylindrica</i> *                    | –                                  | 0  | –                                   | [41]          |
| <i>Anacystis montana</i> *                     | –                                  | 0  | –                                   | [41]          |
| <i>Calothrix</i> sp.                           | –                                  | 23 | WP_096687654.1                      | [41]          |
| <i>Chlorogloeopsis</i> sp.                     | –                                  | 0  | –                                   | [41,42]       |
| <i>Chlorogloeopsis fritschii</i>               | –                                  | 2  | WP_016878379.1<br>RUR72374.1        | [41]          |

|                                        |                                     |       |                |         |
|----------------------------------------|-------------------------------------|-------|----------------|---------|
| <i>Chroococcidiopsis</i> sp.           | –                                   | 1     | WP_169244124.1 | [41]    |
| <i>Cyanothece</i> sp.                  | –                                   | 2     | WP_107670655.1 | [41]    |
| <i>Gleocapsa</i> sp.                   | –                                   | 3     | ELS00147.1     | [41]    |
| <i>Microcystis</i> sp.                 | –                                   | > 100 | WP_002732984.1 | [41]    |
| strains CCAP 1405/3, CCAP 1450/13, 110 | –                                   | 0     | –              | [41]    |
| <i>Microcystis aeruginosa</i>          | –                                   | 100   | WP_052276441.1 | [41]    |
| strain PCC 7808                        | –                                   | 0     | –              | [41]    |
| <i>Nostoc</i> sp.                      | <i>Amorphonostoc</i>                | 96    | AFY41090.1     | [41]    |
| strain PCC 6720                        | –                                   | 0     | –              | [41]    |
| <i>Nostoc muscorum</i>                 | <i>Desmonostoc muscorum</i>         | 2     | WP_193917519.1 | [41]    |
| strains B 1452-12b, CCAP 1453/12       | –                                   | 0     | –              | [41]    |
| <i>Oscillatoria amphigranulata</i>     | <i>Pseudanabaena amphigranulata</i> | 0     | –              | [41]    |
| <i>Phormidium</i> sp.                  | –                                   |       | WP_190625411.1 | [41]    |
| strain OSS4                            | OLV, CYX                            | 0     | –              | [41]    |
| strain RCG                             | PR11                                | 0     | –              | [41]    |
| strain RCO                             | –                                   | 0     | –              | [41]    |
| <i>Phormidium luridum</i>              | <i>Drouetiella lurida</i>           | 0     | –              | [41]    |
| <i>Prochlorothrix hollandica</i>       | –                                   | 1     | WP_017714382.1 | [41,42] |
| strain CCAP 1490/1                     | –                                   | 0     | –              | [41]    |
| <i>Synechocystis</i> sp.               | –                                   | 10    | WP_028946973.1 | [41]    |
| PCC 6714                               | –                                   | 1     | AIE72536.1     | [41]    |
| PCC 6803                               | –                                   | 8     | QWO81910.1     | [41]    |

SHC – squalene-hopene cyclase

\* no record at all in the NCBI database

**Table S2.** List of the cultivated bacterial isolates from four springs of Carlsbad (Karlovy Vary), Czech Republic and ten strains obtained from the Czech Collection of Microorganisms, Brno, Czech Republic.

| Bacterium                                                                           | Cultiv. Temp. | Reference |
|-------------------------------------------------------------------------------------|---------------|-----------|
| <i>Geobacillus stearothermophilus</i> CCM 2062 (no information about source)        | 70            | [43]      |
| <i>Geobacillus stearothermophilus</i> CCM 5965 (Evaporated milk)                    | 70            | [43]      |
| <b><i>Geobacillus stearothermophilus</i> ST-YPD (spring Štěpánka) <sup>a</sup></b>  | <b>58</b>     | [44]      |
| <b><i>Geobacillus stearothermophilus</i> VR-1 (spring Vřídlo) <sup>a</sup></b>      | <b>58</b>     | [44]      |
| <i>Geobacillus stearothermophilus</i> CCM 2062                                      | 55            | [45]      |
| <i>Meiothermus ruber</i> CCM 4212 (Thermal pools, Hveragherti, Iceland)             | 70            | [43]      |
| <i>Meiothermus ruber</i> CCM 4212                                                   | 65            | [46]      |
| <i>Meiothermus ruber</i> CCM 4212                                                   | 55            | [45]      |
| <i>Alicyclobacillus acidoterrestris</i> CCM 4660 (Apple-grape-raspberry juice)      | 70            | [43]      |
| <i>Alicyclobacillus acidoterrestris</i> CCM 4660                                    | 45            | [47]      |
| <i>Thermus aquaticus</i> CCM 3488 (Thermally polluted river near Brussels, Belgium) | 70            | [43]      |
| <i>Thermus aquaticus</i> CCM 3488,                                                  | 65            | [46]      |
| <b><i>Geobacillus kaustophilus</i> ML-1 (spring Mlýnský) <sup>a</sup></b>           | <b>58</b>     | [44]      |
| <b><i>Brevibacillus agri</i> SA-1 (spring Sadový) <sup>a</sup></b>                  | <b>42</b>     | [44]      |

<sup>a</sup> The strains obtained from the thermal springs in Carlsbad, Czech Republic.

**Table S3.** List of the cultivated bacterial isolates from four springs of Carlsbad (Karlovy Vary), Czech Republic.

| <b>Isolate</b>                               | <b>Hot spring</b> | <b>Cultivation</b> | <b>GenBank Accession</b> |
|----------------------------------------------|-------------------|--------------------|--------------------------|
| <i>Brevibacillus agri</i> SA-1               | Sadový            | 42                 | MT251434                 |
| <i>Geobacillus kaustophilus</i> ML-1         | Mlýnský           | 58                 | MT251494                 |
| <i>Geobacillus stearothermophilus</i> ST-YPD | Štěpánka          | 58                 | MT251887                 |
| <i>Geobacillus stearothermophilus</i> VR-1   | Vřídlo            | 58                 | MT251886                 |

**Table S4.** Separation and identification of hopanoids from thermophilic bacteria by RP-LC/MS-ESI.

| Abbreviation | Chemical Formula                                                  | <i>m/z</i> | Abundance (%) | tR (min)        | Structure                                                                                             |
|--------------|-------------------------------------------------------------------|------------|---------------|-----------------|-------------------------------------------------------------------------------------------------------|
| <b>1a</b>    | [C <sub>47</sub> H <sub>76</sub> NO <sub>11</sub> ] <sup>+</sup>  | 830.5413   | 42            | 23.10           | 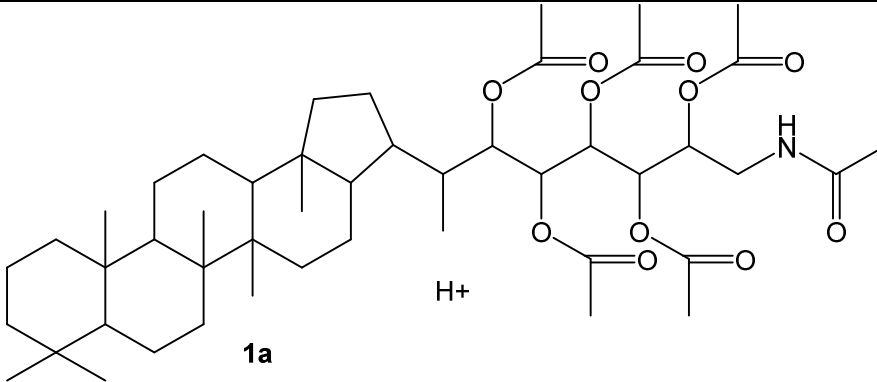 <p><b>1a</b></p>  |
| <b>1b</b>    | [C <sub>59</sub> H <sub>100</sub> NO <sub>11</sub> ] <sup>+</sup> | 998.7294   | 8             | 29.38           |  <p><b>1b</b></p>  |
| <b>1c</b>    | [C <sub>60</sub> H <sub>102</sub> NO <sub>11</sub> ] <sup>+</sup> | 1012.7447  | 34            | 35.06+<br>35.45 |  <p><b>1c</b></p> |

|           |                                                 |           |    |                 |                                                                                      |
|-----------|-------------------------------------------------|-----------|----|-----------------|--------------------------------------------------------------------------------------|
| <b>1d</b> | $[\text{C}_{61}\text{H}_{104}\text{NO}_{11}]^+$ | 1026.7604 | 19 | 39.28           | 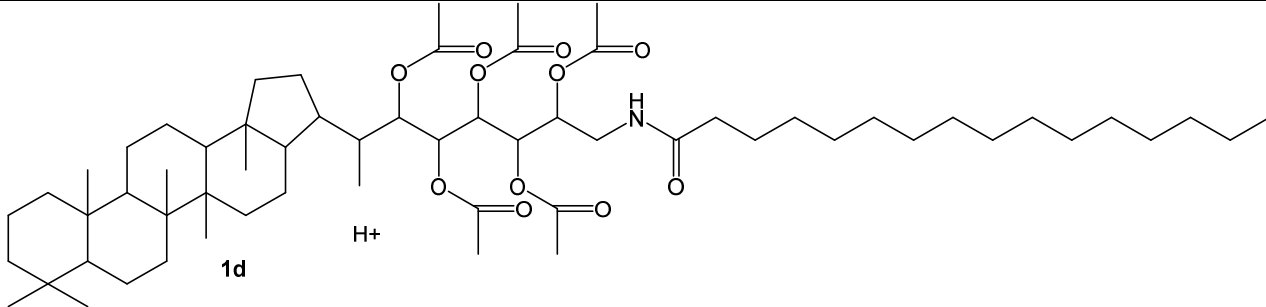   |
| <b>1e</b> | $[\text{C}_{62}\text{H}_{106}\text{NO}_{11}]^+$ | 1040.7760 | 22 | 42.67+<br>43.03 |    |
| <b>2a</b> | $[\text{C}_{45}\text{H}_{74}\text{NO}_9]^+$     | 772.5358  | 21 | 26.17           |  |
| <b>2b</b> | $[\text{C}_{57}\text{H}_{98}\text{NO}_9]^+$     | 940.7236  | 5  | 33.32           |  |

**2c** $[\text{C}_{58}\text{H}_{100}\text{NO}_9]^+$ 

954.7393

17

38.11+  
38.63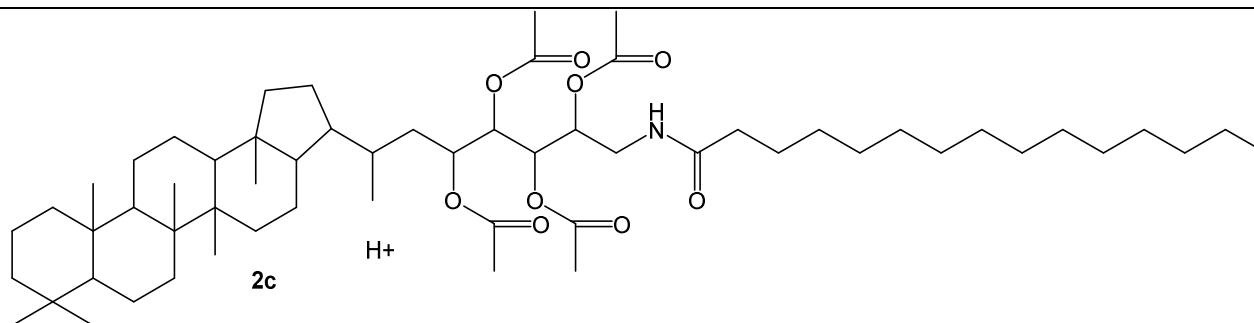**2d** $[\text{C}_{59}\text{H}_{102}\text{NO}_9]^+$ 

968.7549

11

41.45

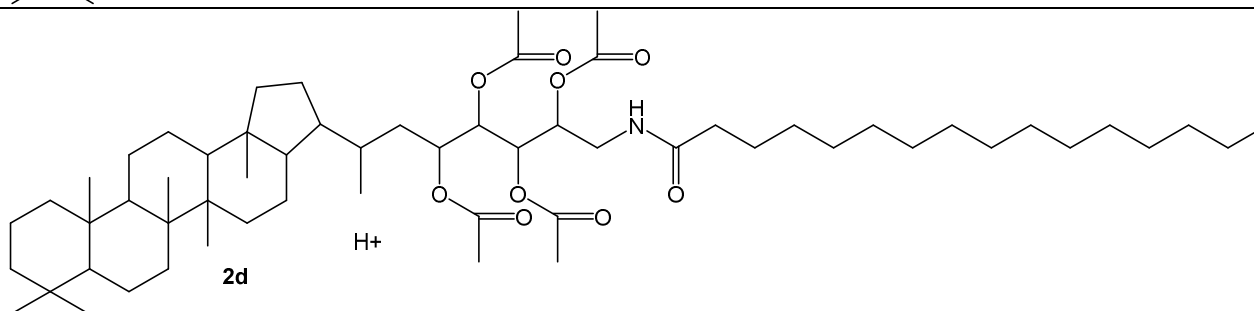**2e** $[\text{C}_{60}\text{H}_{104}\text{NO}_9]^+$ 

982.7706

14

45.16

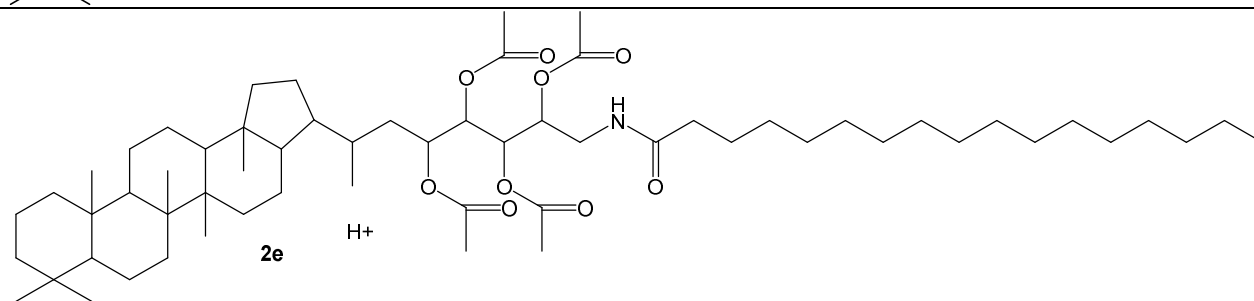**3a** $[\text{C}_{43}\text{H}_{72}\text{NO}_7]^+$ 

714.5303

23

34.24

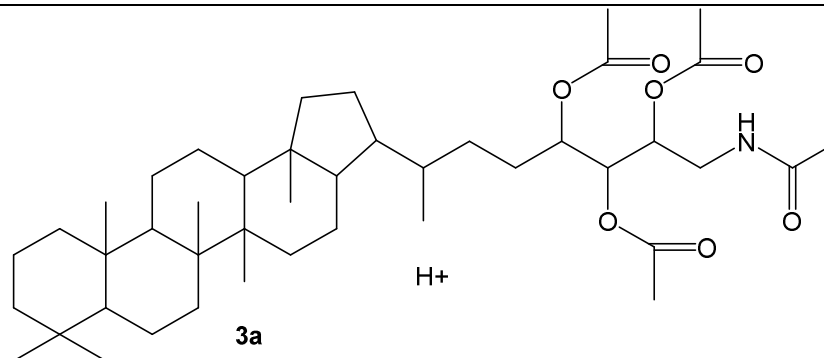



**3b** $[\text{C}_{55}\text{H}_{96}\text{NO}_7]^+$ 

882.7181

5

36.89

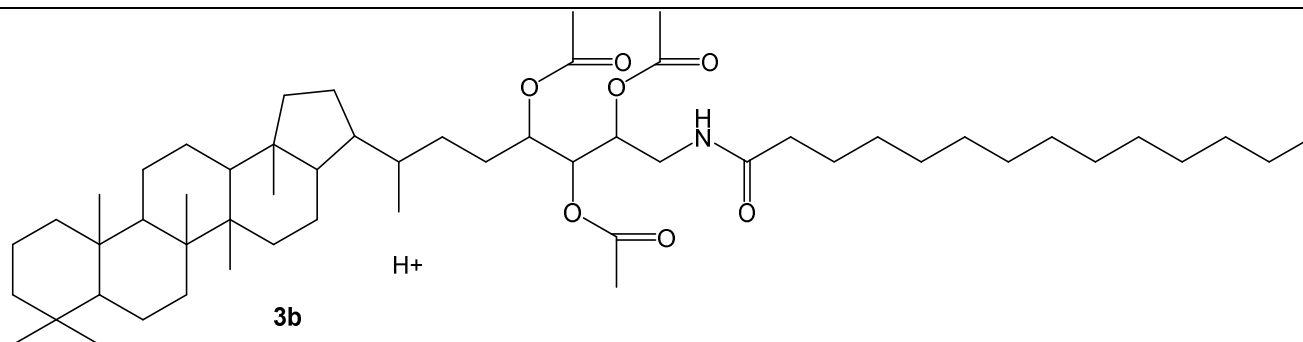**3c** $[\text{C}_{56}\text{H}_{98}\text{NO}_7]^+$ 

896.7338

45

42.12

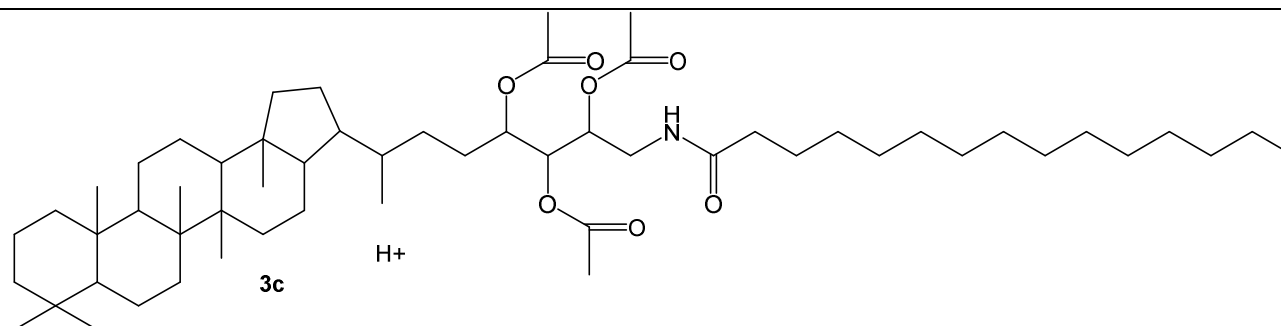**3d** $[\text{C}_{57}\text{H}_{100}\text{NO}_7]^+$ 

910.7494

33

46.65

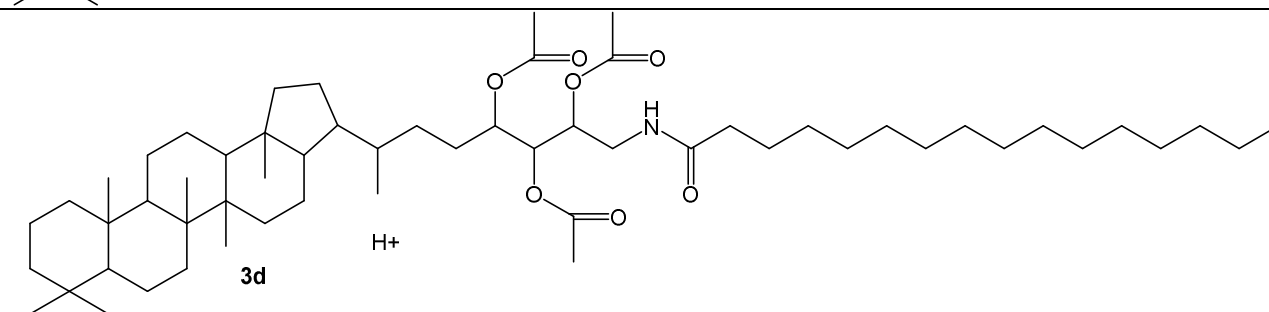**3e** $[\text{C}_{58}\text{H}_{102}\text{NO}_7]^+$ 

924.7651

24

49.74

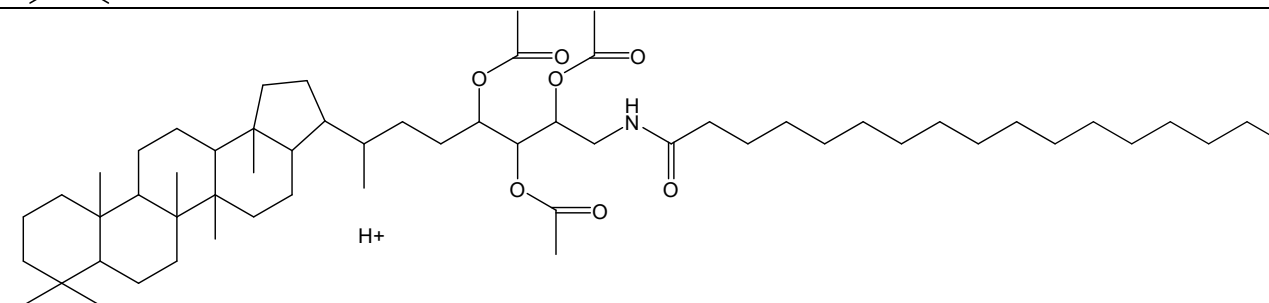

4 [C<sub>46</sub>H<sub>70</sub>N<sub>5</sub>O<sub>6</sub>]<sup>+</sup> 788.5321 18 32.13

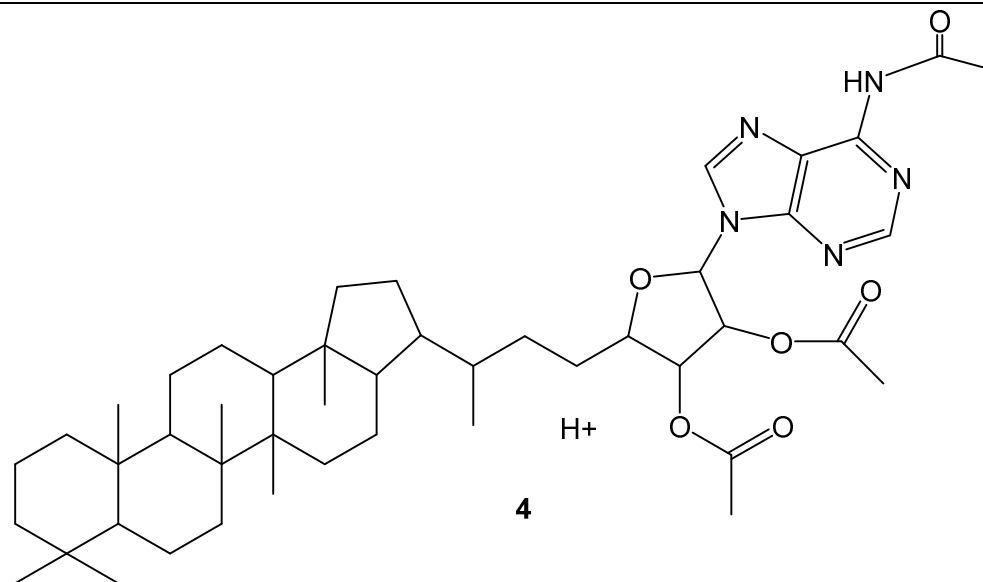

5 [C<sub>43</sub>H<sub>71</sub>O<sub>8</sub>]<sup>+</sup> 715.5143 100 30.14

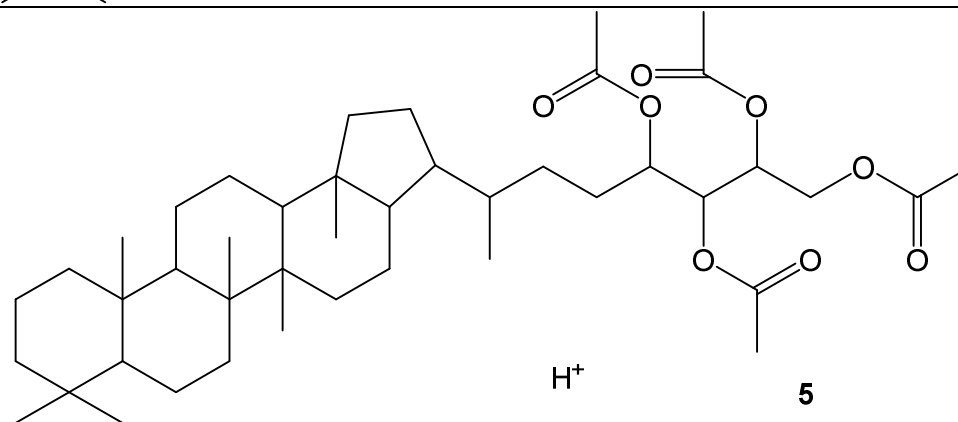

6

 $[\text{C}_{55}\text{H}_{88}\text{NO}_{15}]^+$ 

1002.6151

9

28.54

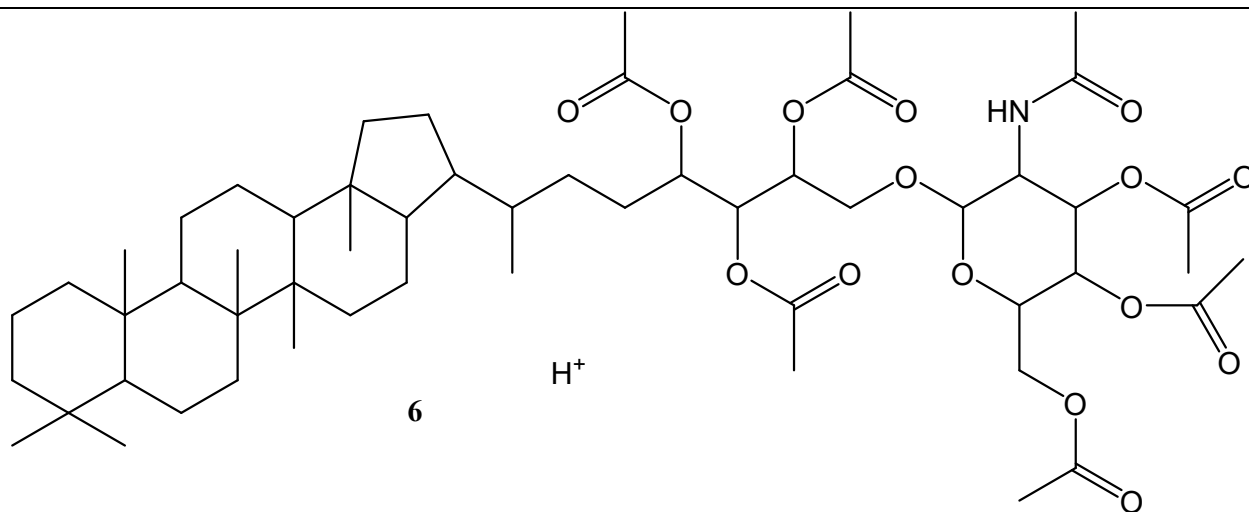

**Table S5.** Occurrence of hopanoid C-2 methylase and/or hopanoid C-3 methylase in analyzed thermophilic bacteria. In the table *hpnP* stands for hopanoid C-2 methylase gene and *hpnR* for hopanoid C-3 methylase. Sequencies used for analysis were as follows: B3QHD1 Hopanoid C-2 methylase from *Rhodopseudomonas palustris* (strain TIE-1) and Q60AV6 Hopanoid C-3 methylase from *Methylococcus capsulatus* (strain ATCC 33009).

|                                                     | <i>Alicyclobacillus acidoterrestris</i>           |                                                   | <i>Brevibacillus agri</i>                         |                                                   | <i>Geobacillus kaustophilus</i>                         |                                                         | <i>Geobacillus stearothermophilus</i>             |                                                   | <i>Geobacillus thermoglucosidasius</i>            |                                                   |
|-----------------------------------------------------|---------------------------------------------------|---------------------------------------------------|---------------------------------------------------|---------------------------------------------------|---------------------------------------------------------|---------------------------------------------------------|---------------------------------------------------|---------------------------------------------------|---------------------------------------------------|---------------------------------------------------|
| Enzyme                                              | <i>hpnP</i>                                       | <i>hpnR</i>                                       | <i>hpnP</i>                                       | <i>hpnR</i>                                       | <i>hpnP</i>                                             | <i>hpnR</i>                                             | <i>hpnP</i>                                       | <i>hpnR</i>                                       | <i>hpnP</i>                                       | <i>hpnR</i>                                       |
| <b>Detected protein with the highest similarity</b> | B12-binding domain-containing radical SAM protein | Mg-protoporphyrin IX monomethyl ester oxidative cyclase | Mg-protoporphyrin IX monomethyl ester oxidative cyclase | B12-binding domain-containing radical SAM protein |
| <b>Similarity percentage</b>                        | 61.2 %                                            | 84.3 %                                            | 48.5 %                                            | 63.5 %                                            | 48.9 %                                                  | 65.9 %                                                  | 55.5 %                                            | 92.0 %                                            | 50.4 %                                            | 64.7 %                                            |
| <b>ID</b>                                           | EPZ45238.1                                        | EPZ45238.1                                        | ELK42704.1                                        | QAV14985.1<br>RNB47569.1<br>GED27563.1            | BAD75227.1                                              | BAD75227.1                                              | KZM55362.1<br>QOR85095.1                          | ALA71377.1                                        | RDE27903.1<br>WP_0032521<br>70.1<br>GCD83585.1    | GCD83585.1<br>RDE27903.1<br>ALF09928.1            |

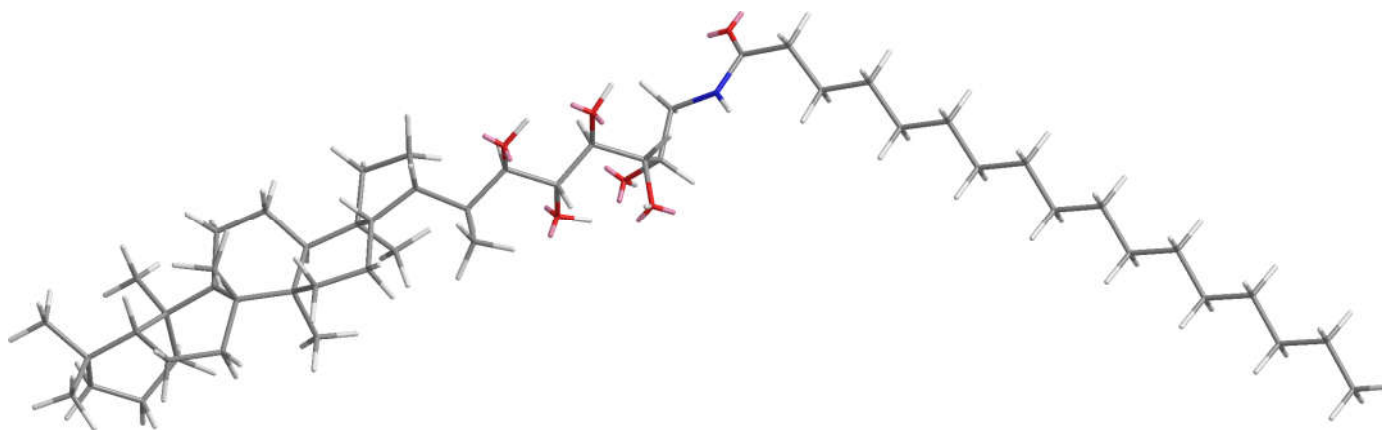

**Figure S1.** Model of *N*-acyl derivative of bacteriohopanepentol.

## References

1. Langworthy, T.; Mayberry, W. 1,2,3,4-Tetrahydroxy Pentane-Substituted Pentacyclic Triterpene from *Bacillus acidocaldarius*. *Biochim. Biophys. Acta* **1976**, *431*, 570–577, doi:10.1016/0005-2760(76)90221-6.
2. Kannenberg, E.; Blume, A.; Geckeler, K.; Poralla, K. Properties of Hopanoids and Phosphatidylcholines Containing Omega-Cyclohexane Fatty-Acid in Monolayer and Liposome Experiments. *Biochim. Biophys. Acta* **1985**, *814*, 179–185, doi:10.1016/0005-2736(85)90434-1.
3. Hippchen, B.; Röhl, A.; Poralla, K. Occurrence in Soil of Thermo-Acidophilic Bacilli Possessing  $\omega$ -Cyclohexane Fatty Acids and Hopanoids. *Arch. Microbiol.* **1981**, *129*, 53–55, doi:10.1007/BF00417180.
4. Poralla, K.; Härtner, T.; Kannenberg, E. Effect of Temperature and pH on the Hopanoid Content of *Bacillus acidocaldarius*. *FEMS Microbiol. Lett.* **1984**, *23*, 253–256, doi:10.1111/j.1574-6968.1984.tb01073.x.
5. Siedenburg, G.; Jendrossek, D. Squalene-Hopene Cyclases. *Appl. Environ. Microbiol.* **2011**, *77*, 3905–3915, doi:10.1128/AEM.00300-11.
6. Kontnik, R.; Bosak, T.; Butcher, R.A.; Brocks, J.J.; Losick, R.; Clardy, J.; Pearson, A. Sporulenes, Heptaprenyl Metabolites from *Bacillus subtilis* Spores. *Org. Lett.* **2008**, *10*, 3551–3554, doi:10.1021/ol801314k.
7. Talbot, H.M.; Rohmer, M.; Farrimond, P. Rapid Structural Elucidation of Composite Bacterial Hopanoids by Atmospheric Pressure Chemical Ionisation Liquid Chromatography/Ion Trap Mass Spectrometry. *Rapid Commun. Mass Spectrom.* **2007**, *21*, 880–892, doi:10.1002/rcm.2911.
8. Perzl, M.; Müller, P.; Poralla, K.; Kannenberg, E.L. Squalene-Hopene Cyclase from *Bradyrhizobium japonicum*: Cloning, Expression, Sequence Analysis and Comparison to Other Triterpenoid Cyclases. *Microbiology* **1997**, *143*, 1235–1242.
9. Kannenberg, E.L.; Perzl, M.; Müller, P.; Härtner, T.; Poralla, K. Hopanoid Lipids in *Bradyrhizobium* and Other Plant-Associated Bacteria and Cloning of the *Bradyrhizobium japonicum* Squalene-Hopene Cyclase Gene. *Plant Soil* **1996**, *186*, 107–112, doi:10.1007/BF00035063.
10. Schwartz-Narbonne, R.; Schaeffer, P.; Hopmans, E.C.; Schenese, M.; Charlton, E.A.; Jones, D.M.; Damste, J.S.S.; Ul Haque, M.F.; Jetten, M.S.M.; Lengger, S.K.; et al. A Unique Bacteriohopanetetrol Stereoisomer of Marine Anammox. *Org. Geochem.* **2020**, *143*, doi:10.1016/j.orggeochem.2020.103994.
11. Rohmer, M.; Bouvier-Nave, P.; Ourisson, G. Distribution of Hopanoid Triterpenes in Prokaryotes. *Microbiology*, **1984**, *130*, 1137–1150.
12. Sáenz, J.P.; Waterbury, J.B.; Eglinton, T.I.; Summons, R.E. Hopanoids in Marine Cyanobacteria: Probing Their Phylogenetic Distribution and Biological Role. *Geobiology* **2012**, *10*, 311–319, doi:10.1111/j.1472-4669.2012.00318.x.
13. Blumenberg, M.; Oppermann, B.I.; Guyoneaud, R.; Michaelis, W. Hopanoid Production by *Desulfovibrio bastinii* Isolated from Oilfield Formation Water. *FEMS Microbiol. Lett.* **2009**, *293*, 73–78, doi:10.1111/j.1574-6968.2009.01520.x.
14. Joyeux, C.; Fouchard, S.; Llopiz, P.; Neunlist, S. Influence of the Temperature and the Growth Phase on the Hopanoids and Fatty Acids Content of *Frateuria aurantia* (DSMZ 6220). *FEMS Microbiol. Ecol.* **2004**, *47*, 371–379, doi:10.1016/S0168-6496(03)00302-7.
15. Eickhoff, M.; Birgel, D.; Talbot, H.M.; Peckmann, J.; Kappler, A. Bacteriohopanoid Inventory of *Geobacter sulfurreducens* and *Geobacter metallireducens*. *Org. Geochem.* **2013**, *58*, 107–114, doi:10.1016/j.orggeochem.2013.02.013.

16. Talbot, H.M.; Rohmer, M.; Farrimond, P. Structural Characterisation of Unsaturated Bacterial Hopanoids by Atmospheric Pressure Chemical Ionisation Liquid Chromatography/Ion Trap Mass Spectrometry. *Rapid Commun. Mass Spectrom.* **2007**, *21*, 1613–1622, doi:10.1002/rcm.2997.
17. van Winden, J.F.; Talbot, H.M.; Kip, N.; Reichart, G.-J.; Pol, A.; McNamara, N.P.; Jetten, M.S.M.; Op den Camp, H.J.M.; Sinninghe Damsté, J.S. Bacteriohopanepolyol Signatures as Markers for Methanotrophic Bacteria in Peat Moss. *Geochim. Cosmochim. Acta* **2012**, *77*, 52–61, doi:10.1016/j.gca.2011.10.026.
18. Knani, M.; Corpe, W.; Rohmer, M. Bacterial Hopanoids from Pink-Pigmented Facultative Methylophs (PPFMs) and from Green Plant-Surfaces. *Microbiol.-UK* **1994**, *140*, 2755–2759, doi:10.1099/00221287-140-10-2755.
19. Liu, W.; Bodlenner, A.; Rohmer, M. Hemisynthesis of Deuteriated Adenosylhopane and Conversion into Bacteriohopanetetrol by a Cell-Free System from *Methylobacterium organophilum*. *Org. Biomol. Chem.* **2015**, *13*, 3393–3405, doi:10.1039/c4ob02560a.
20. Neunlist, S.; Rohmer, M. Novel Hopanoids from the Methylophic Bacteria *Methylococcus capsulatus* and *Methylomonas methanica* - (22S)-35-Aminobacteriohopane-30,31,32,33,34-Pentol and (22s)-35-Amino-3-Beta-Methylbacteriohopane-30,31,32,33,34-Pentol. *Biochem. J.* **1985**, *231*, 635–639, doi:10.1042/bj2310635.
21. Jahnke, L.L.; Summons, R.E.; Hope, J.M.; Marais, D.J.D. Carbon Isotopic Fractionation in Lipids from Methanotrophic Bacteria II: The Effects of Physiology and Environmental Parameters on the Biosynthesis and Isotopic Signatures of Biomarkers. *Geochim. Cosmochim. Acta* **1999**, *63*, 79–93, doi:https://doi.org/10.1016/S0016-7037(98)00270-1.
22. Talbot, H.M.; Squier, A.H.; Keely, B.J.; Farrimond, P. Atmospheric Pressure Chemical Ionisation Reversed-Phase Liquid Chromatography/Ion Trap Mass Spectrometry of Intact Bacteriohopanepolyols. *Rapid Commun. Mass Spectrom.* **2003**, *17*, 728–737, doi:10.1002/rcm.974.
23. Talbot, H.M.; Sidgwick, F.R.; Bischoff, J.; Osborne, K.A.; Rush, D.; Sherry, A.; Spencer-Jones, C.L. Analysis of Non-Derivatised Bacteriohopanepolyols by Ultrahigh-Performance Liquid Chromatography/Tandem Mass Spectrometry. *Rapid Commun. Mass Spectrom.* **2016**, *30*, 2087–2098, doi:https://doi.org/10.1002/rcm.7696.
24. Tippelt, A.; Jahnke, L.; Poralla, K. Squalene-Hopene Cyclase from *Methylococcus Capsulatus* (Bath): A Bacterium Producing Hopanoids and Steroids. *Biochim. Biophys. Acta* **1998**, *1391*, 223–232, doi:10.1016/S0005-2760(97)00212-9.
25. Kool, D.M.; Talbot, H.M.; Rush, D.; Ettwig, K.; Damsté, J.S.S. Rare Bacteriohopanepolyols as Markers for an Autotrophic, Intra-Aerobic Methanotroph. *Geochim. Cosmochim. Acta* **2014**, *136*, 114–125, doi:https://doi.org/10.1016/j.gca.2014.04.002.
26. Bale, N.J.; Rijpstra, W.I.C.; Sahonero-Canavesi, D.X.; Oshkin, I.Y.; Belova, S.E.; Dedys, S.N.; Sinninghe Damsté, J.S. Fatty Acid and Hopanoid Adaption to Cold in the Methanotroph *Methylovulum psychrotolerans*. *Front. Microbiol.* **2019**, *10*, 589, doi:10.3389/fmicb.2019.00589.
27. Seemann, M.; Bissere, P.; Trit, J.-P.; Hooper, A.B.; Rohmer, M. Novel Bacterial Triterpenoids of the Hopane Series from *Nitrosomonas europaea* and Their Significance for the Formation of the C35 Bacteriohopane Skeleton. *Tetrahedron Lett.* **1999**, *40*, 1681–1684, doi:10.1016/S0040-4039(99)00064-7.
28. Sadaf, K.; Tushar, L.; Nirosha, P.; Podile, A.R.; Sasikala, C.; Ramana, C.V. *Paenibacillus Arachidis* Sp. Nov., Isolated from Groundnut Seeds. *Int. J. Syst. Evol. Microbiol.* **2016**, *66*, 2923–2928, doi:10.1099/ijsem.0.001124.
29. Neunlist, S.; Bissere, P.; Rohmer, M. The Hopanoids of the Purple Non-Sulfur Bacteria *Rhodopseudomonas alustris* and *Rhodopseudomonas acidophila* and the Absolute-Configuration of Bacteriohopanetetrol. *Eur. J. Biochem.* **1988**, *171*, 245–252, doi:10.1111/j.1432-1033.1988.tb13783.x.
30. Neunlist, S.; Rohmer, M. A Novel Hopanoid, 30-(5'-Adenosyl)Hopane, from the Purple Non-Sulfur Bacterium *Rhodopseudomonas acidophila*, with Possible DNA Interactions. *Biochem. J.* **1985**, *228*, 769–771, doi:10.1042/bj2280769.
31. Neunlist, S.; Holst, O.; Rohmer, M. Prokaryotic Triterpenoids - the Hopanoids of the Purple Non-Sulfur Bacterium *Rhodomicrobium vannielii* - an Aminotriol and Its Aminoacyl Derivatives, *N*-Tryptophanyl and *N*-Ornithinyl Aminotriol. *Eur. J. Biochem.* **1985**, *147*, 561–568, doi:10.1111/j.0014-2956.1985.00561.x.
32. Kulkarni, G.; Wu, C.-H.; Newmana, D.K. The General Stress Response Factor EcfG Regulates Expression of the C-2 Hopanoid Methylase HpnP in *Rhodopseudomonas palustris* TIE-1. *J. Bacteriol.* **2013**, *195*, 2490–2498, doi:10.1128/JB.00186-13.
33. Wu, C.-H.; Kong, L.; Bialecka-Fornal, M.; Park, S.; Thompson, A.L.; Kulkarni, G.; Conway, S.J.; Newman, D.K. Quantitative Hopanoid Analysis Enables Robust Pattern Detection and Comparison between Laboratories. *Geobiology* **2015**, *13*, 391–407, doi:10.1111/gbi.12132.

34. Sessions, A.L.; Zhang, L.; Welander, P.V.; Doughty, D.; Summons, R.E.; Newman, D.K. Identification and Quantification of Polyfunctionalized Hopanoids by High Temperature Gas Chromatography-Mass Spectrometry. *Org. Geochem.* **2013**, *56*, 120–130, doi:10.1016/j.orggeochem.2012.12.009.
35. Eickhoff, M.; Birgel, D.; Talbot, H.M.; Peckmann, J.; Kappler, A. Diagenetic Degradation Products of Bacteriohopanepolyols Produced by *Rhodopseudomonas palustris* Strain TIE-1. *Org. Geochem.* **2014**, *68*, 31–38, doi:10.1016/j.orggeochem.2014.01.002.
36. Ramana, C.V.; Srinivas, A.; Subhash, Y.; Tushar, L.; Mukherjee, T.; Kiran, P.U.; Sasikala, C. *Salinicoccus halitifaciens* Sp. Nov., a Novel Bacterium Participating in Halite Formation. *Antonie Van Leeuwenhoek* **2013**, *103*, 885–898, doi:10.1007/s10482-012-9870-4.
37. Liu, W.; Sakr, E.; Schaeffer, P.; Talbot, H.M.; Donisi, J.; Härtner, T.; Kannenberg, E.; Takano, E.; Rohmer, M. Ribosylhopane, a Novel Bacterial Hopanoid, as Precursor of C35 Bacteriohopanepolyols in *Streptomyces coelicolor* A3(2). *ChemBioChem* **2014**, *15*, 2156–2161, doi:https://doi.org/10.1002/cbic.201402261.
38. Ghimire, G.P.; Koirala, N.; Sohng, J.K. Activation of Cryptic Hop Genes from *Streptomyces peucetius* ATCC 27952 Involved in Hopanoid Biosynthesis. *J. Microbiol. Biotechnol.* **2015**, *25*, 658–661, doi:10.4014/jmb.1408.08058.
39. Seipke, R.F.; Loria, R. Hopanoids Are Not Essential for Growth of *Streptomyces scabies* 87-22. *J. Bacteriol.* **2009**, *191*, 5216–5223, doi:10.1128/JB.00390-09.
40. Schmidt, A.; Bringer-Meyer, S.; Poralla, K.; Sahm, H. Effect of Alcohols and Temperature on the Hopanoid Content of *Zymomonas mobilis*. *Appl. Microbiol. Biotechnol.* **1986**, *25*, 32–36, doi:10.1007/BF00252509.
41. Talbot, H.M.; Summons, R.E.; Jahnke, L.L.; Cockell, C.S.; Rohmer, M.; Farrimond, P. Cyanobacterial Bacteriohopanepolyol Signatures from Cultures and Natural Environmental Settings. *Org. Geochem.* **2008**, *39*, 232–263, doi:10.1016/j.orggeochem.2007.08.006.
42. Talbot, H.M.; Summons, R.; Jahnke, L.; Farrimond, P. Characteristic Fragmentation of Bacteriohopanepolyols during Atmospheric Pressure Chemical Ionisation Liquid Chromatography/Ion Trap Mass Spectrometry. *Rapid Commun. Mass Spectrom.* **2003**, *17*, 2788–2796, doi:https://doi.org/10.1002/rcm.1265.
43. Siristova, L.; Melzoch, K.; Rezanka, T. Fatty Acids, Unusual Glycophospholipids and DNA Analyses of Thermophilic Bacteria Isolated from Hot Springs. *Extremophiles* **2009**, *13*, 101–109, doi:10.1007/s00792-008-0202-6.
44. Gharwalova, L.; Palyzova, A.; Maresova, H.; Kolouchova, I.; Kyselova, L.; Rezanka, T. Identification of Homologous Polyprenols from Thermophilic Bacteria. *Microorganisms* **2021**, *9*, 1168, doi:10.3390/microorganisms9061168.
45. Siristova, L.; Luhovy, R.; Sigler, K.; Rezanka, T. Biosynthesis of  $\omega$ -Alicyclic Fatty Acids Induced by Cyclic Precursors and Change of Membrane Fluidity in Thermophilic Bacteria *Geobacillus stearothermophilus* and *Meiothermus ruber*. *Extremophiles* **2011**, *15*, 423–429, doi:10.1007/s00792-011-0373-4.
46. Rezanka, T.; Siristova, L.; Sigler, K. Rhamnolipid-Producing Thermophilic Bacteria of Species *Thermus* and *Meiothermus*. *Extremophiles* **2011**, *15*, 697–709, doi:10.1007/s00792-011-0400-5.
47. Rezanka, T.; Siristova, L.; Schreiberova, O.; Rezanka, M.; Masak, J.; Melzoch, K.; Sigler, K. Pivalic Acid Acts as a Starter Unit in a Fatty Acid and Antibiotic Biosynthetic Pathway in *Alicyclobacillus*, *Rhodococcus* and *Streptomyces*. *Environ. Microbiol.* **2011**, *13*, 1577–1589, doi:10.1111/j.1462-2920.2011.02465.x.
